# Supplementary material for: Carotid artery wall shear stress is independently correlated with renal function in the elderly
Source: PubMed Central journal article supplement (PMC5797047; doi:10.18632/oncotarget.23825), 2018-01-02
Supplement: oncotarget-09-5251-s001.pdf [file oncotarget-09-5251-s001.pdf]

# Carotid artery wall shear stress is independently correlated with renal function in the elderly

## SUPPLEMENTARY MATERIALS

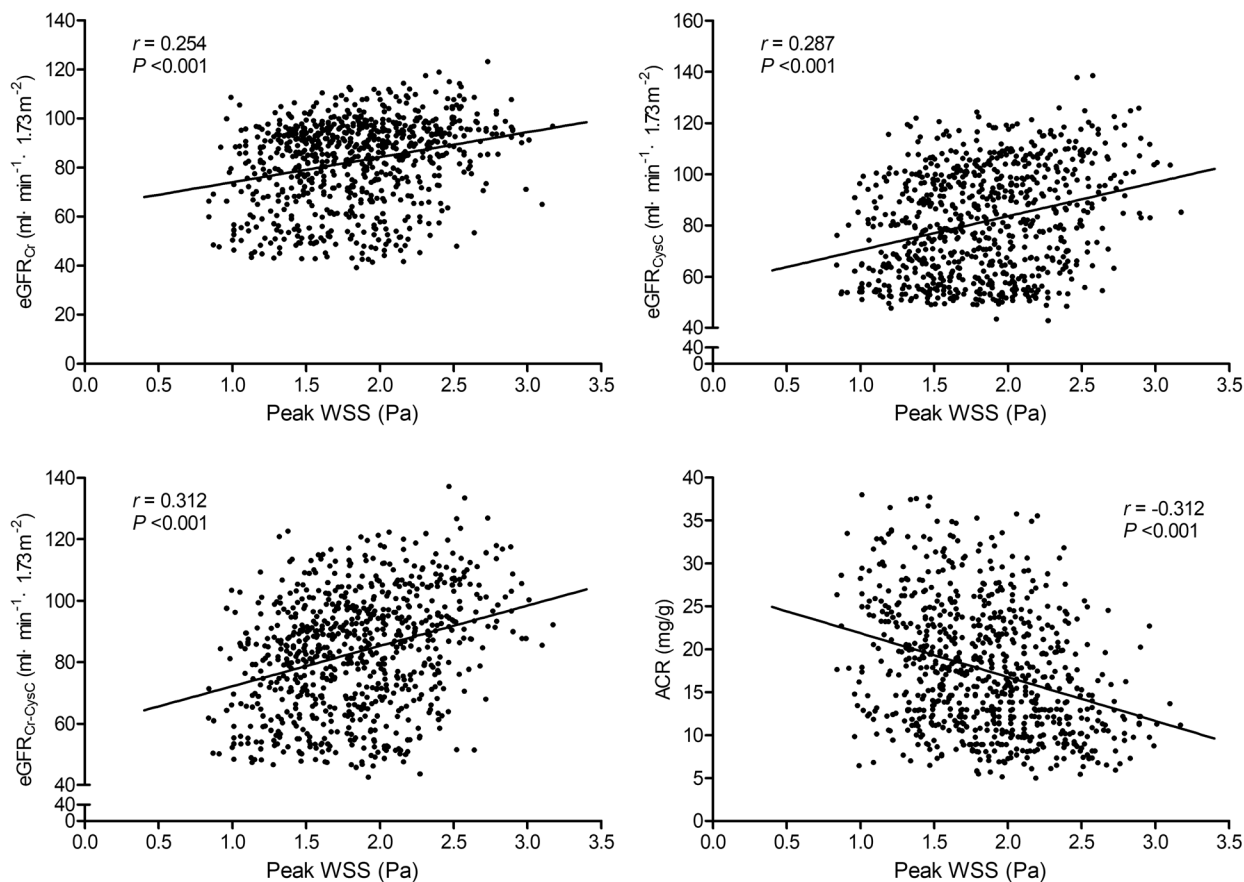

**Supplementary Figure 1: Correlations of carotid peak wall shear stress with the eGFR<sub>Cr</sub>, eGFR<sub>CysC</sub>, eGFR<sub>Cr-CysC</sub>, and ACR.** WSS indicates wall shear stress; eGFR<sub>Cr</sub>, estimated glomerular filtration rate base on creatinine; eGFR<sub>CysC</sub>, estimated glomerular filtration rate base on cystatin C; eGFR<sub>Cr-CysC</sub>, estimated glomerular filtration rate base on creatinine and cystatin C; ACR, albumin/creatinine ratio.

**Supplementary Table 1: Clinical and biochemical characteristics of participants grouped by the interquartile of carotid peak wall shear stress**

|                                        | Q1<br>(n=191)               | Q2<br>(n=190)             | Q3<br>(n=190)              | Q4<br>(n=190)                 | P value |
|----------------------------------------|-----------------------------|---------------------------|----------------------------|-------------------------------|---------|
| <b>Clinical parameters</b>             |                             |                           |                            |                               |         |
| Age, years                             | 71.51±6.38                  | 70.63±6.27                | 71.24±5.86                 | 69.42±5.90*                   | 0.004   |
| Sex, Male:Female                       | 89:102                      | 100:90                    | 97:93                      | 95:95                         | 0.684   |
| BMI, kg/m <sup>2</sup>                 | 24.28±2.71                  | 24.34±3.05                | 24.24±2.92                 | 24.40±2.78                    | 0.954   |
| SBP, mm Hg                             | 145.72±12.42                | 141.05±12.74*             | 140.49±13.70*              | 138.05±14.85*                 | <0.001  |
| DBP, mm Hg                             | 69.62±7.23                  | 70.38±6.95                | 69.70±6.59                 | 69.22±7.41                    | 0.445   |
| <b>Biochemical parameters</b>          |                             |                           |                            |                               |         |
| TCHO, mmol/L                           | 4.43±0.62                   | 4.60±0.69                 | 4.64±0.65*                 | 4.61±0.64*                    | 0.008   |
| TG, mmol/L                             | 1.43±0.37                   | 1.42±0.34                 | 1.47±0.34                  | 1.49±0.32                     | 0.157   |
| HDL-c, mmol/L                          | 1.15±0.16                   | 1.13±0.17                 | 1.14±0.19                  | 1.14±0.20                     | 0.740   |
| LDL-c, mmol/L                          | 2.64±0.59                   | 2.83±0.68*                | 2.83±0.64*                 | 2.79±0.59                     | 0.006   |
| FPG, mmol/L                            | 5.26±0.83                   | 5.38±0.99                 | 5.31±0.98                  | 5.35±0.85                     | 0.601   |
| Cr, mg/dl                              | 0.82 (0.70, 0.98)           | 0.78 (0.66, 0.93)         | 0.79 (0.66, 0.93)          | 0.71 (0.61, 0.84)*†‡          | <0.001  |
| Cys C, mg/L                            | 0.99±0.19                   | 0.94±0.21                 | 0.94±0.21                  | 0.85±0.22*†‡                  | <0.001  |
| UA, mg/L                               | 1.67 (0.98, 2.37)           | 1.35 (0.90, 1.97)         | 1.30 (0.80, 2.00)*         | 0.92 (0.68, 1.41)*†‡          | <0.001  |
| <b>Covariates</b>                      |                             |                           |                            |                               |         |
| Current smoker, n (%)                  | 41 (21.47)                  | 50 (26.32)                | 47 (24.74)                 | 40 (21.05)                    | 0.557   |
| Alcohol consumption, n (%)             | 69 (36.13)                  | 79 (41.58)                | 77 (40.53)                 | 84 (44.21)                    | 0.442   |
| Hypertension, n (%)                    | 155 (81.15)                 | 114 (60.00)*              | 117 (61.58)*               | 103 (54.21)*                  | <0.001  |
| Antihypertension, n (%)                | 150 (96.77)                 | 107 (93.86)               | 104 (88.89)*               | 83 (80.58)*†                  | <0.001  |
| Diabetes, n (%)                        | 18 (9.47)                   | 25 (13.16)                | 25 (13.16)                 | 25 (13.16)                    | 0.602   |
| Antidiabetes, n (%)                    | 18 (100.00)                 | 23 (92.00)                | 22 (88.00)                 | 24 (96.00)                    | 0.413   |
| Dyslipidemia, n (%)                    | 57 (29.84)                  | 43 (22.63)                | 57 (30.00)                 | 63 (33.16)†                   | 0.003   |
| Anti-dyslipidemia, n (%)               | 28 (49.12)                  | 21 (48.84)                | 32 (56.14)                 | 27 (42.86)                    | 0.907   |
| Carotid plaque, n (%)                  | 97 (50.79)                  | 69 (36.32)*               | 55 (28.95)*                | 41 (21.58)*†                  | <0.001  |
| <b>Endothelial function parameters</b> |                             |                           |                            |                               |         |
| Brachial artery FMD, %                 | 10.35±2.71                  | 11.14±2.83*               | 12.13±2.98*†               | 13.77±2.47*†‡                 | <0.001  |
| NO, μmol/L                             | 55.48±12.70                 | 61.14±13.69*              | 64.22±13.67*               | 71.50±13.18*†‡                | <0.001  |
| ET-1, pg/ml                            | 45.65±8.01                  | 44.11±9.33                | 41.70±9.20*†               | 37.62±7.69*†‡                 | <0.001  |
| ICAM-1, ng/ml                          | 152.57±35.72                | 145.50±37.77              | 136.53±33.66*              | 126.91±28.20*†‡               | <0.001  |
| VCAM-1, ng/ml                          | 6551.93 (567.57,<br>739.62) | 621.25<br>(552.23,705.62) | 613.58 (559.90,<br>697.85) | 582.91 (500.71,<br>659.60)*†‡ | <0.001  |

Data are mean±standard deviation or number (percentage). Q1 indicates the first interquartile; Q2, the second interquartile; Q3, the third interquartile; Q4, the fourth interquartile; BMI, body mass index; SBP, systolic blood pressure; DBP, diastolic blood pressure; TCHO, total cholesterol; TG, triglycerides; HDL-c, high-density lipoprotein cholesterol; LDL-c, low-density lipoprotein cholesterol; Cr, creatinine; Cys C, cystatin C; UA, Urinary albumin; FMD, flow-mediated dilation; NO, nitric oxide; ET-1, endothelin-1; ICAM-1, intercellular adhesion molecule-1; and VCAM-1, vascular cell adhesion molecule-1. \**P* <0.05, as compared to Q1; †*P* <0.05, as compared to Q2; ‡*P* <0.05, as compared to Q3.

**Supplementary Table 2: Estimated glomerular filtration rates and albumin/creatinine ratio of participants grouped by the interquartile of carotid peak wall shear stress**

|                                                                     | Q1<br>(n=191) | Q2<br>(n=190) | Q3<br>(n=190) | Q4<br>(n=190)               | P value |
|---------------------------------------------------------------------|---------------|---------------|---------------|-----------------------------|---------|
| eGFR <sub>Cr</sub> , ml/min/1.73 m <sup>2</sup>                     | 77.06±17.52   | 81.95±16.67*  | 82.07±18.12*  | 89.02±15.49* <sup>†,‡</sup> | <0.001  |
| eGFR <sub>CysC</sub> , ml·min <sup>-1</sup> ·1.73m <sup>-2</sup>    | 75.12±18.47   | 80.23±19.96   | 80.92±20.73*  | 89.68±21.29* <sup>†,‡</sup> | <0.001  |
| eGFR <sub>Cr-CysC</sub> , ml·min <sup>-1</sup> ·1.73m <sup>-2</sup> | 76.56±17.17   | 82.12±17.95*  | 82.58±19.29*  | 91.45±18.45* <sup>†,‡</sup> | <0.001  |
| ACR, mg/g                                                           | 20.21±7.61    | 18.40±7.13*   | 17.31±6.83*   | 14.42±7.25* <sup>†,‡</sup>  | <0.001  |

Data are mean±standard deviation. Q1 indicates the first interquartile; Q2, the second interquartile; Q3, the third interquartile; Q4, the fourth interquartile; eGFR<sub>Cr</sub>, estimated glomerular filtration rate based on creatinine; eGFR<sub>CysC</sub>, estimated glomerular filtration rate based on cystatin C; eGFR<sub>Cr-CysC</sub>, estimated glomerular filtration rate based on creatinine and cystatin C; ACR, albumin/creatinine ratio. \**P* < 0.05, as compared to Q1; <sup>†</sup>*P* < 0.05, as compared to Q2; <sup>‡</sup>*P* < 0.05, as compared to Q3.

Supplementary Table 3: Regression coefficients (95%) of carotid peak WSS with renal function parameters

|                      | eGFR <sub>Cr</sub><br>(ml·min <sup>-1</sup> ·1.73m <sup>-2</sup> ) |            | eGFR <sub>CysC</sub><br>(ml·min <sup>-1</sup> ·1.73m <sup>-2</sup> ) |            | eGFR <sub>Cr-CysC</sub><br>(ml·min <sup>-1</sup> ·1.73m <sup>-2</sup> ) |            | ACR<br>(mg/g)                  |            |
|----------------------|--------------------------------------------------------------------|------------|----------------------------------------------------------------------|------------|-------------------------------------------------------------------------|------------|--------------------------------|------------|
|                      | Beta coefficient<br>(95% C.I.)                                     | P<br>value | Beta coefficient<br>(95% C.I.)                                       | P<br>value | Beta coefficient<br>(95% C.I.)                                          | P<br>value | Beta coefficient<br>(95% C.I.) | P<br>value |
| Model 1 <sup>a</sup> | 5.645 (3.534,<br>7.755)                                            | <0.001     | 9.540 (6.824,<br>12.257)                                             | <0.001     | 9.443 (6.959,<br>11.926)                                                | <0.001     | -4.669 (-5.774,<br>-3.564)     | <0.001     |
| Model 2 <sup>b</sup> | 5.826 (3.707,<br>7.946)                                            | <0.001     | 9.561 (6.860,<br>12.321)                                             | <0.001     | 9.608 (7.113,<br>12.103)                                                | <0.001     | -4.637 (-5.748,<br>-3.525)     | <0.001     |
| Model 3 <sup>c</sup> | 6.007 (3.868,<br>8.147)                                            | <0.001     | 7.861 (5.118,<br>10.604)                                             | <0.001     | 7.946 (5.636,<br>10.256)                                                | <0.001     | -3.536 (-4.547,<br>-2.525)     | <0.001     |

eGFR<sub>Cr</sub> indicates estimated glomerular filtration rate base on creatinine; eGFR<sub>CysC</sub>, estimated glomerular filtration rate base on cystatin C; eGFR<sub>Cr-CysC</sub>, estimated glomerular filtration rate base on creatinine and cystatin C; ACR, albumin/creatinine ratio.

<sup>a</sup>Model 1: adjusted for age, sex.

<sup>b</sup>Model 2: model 1 + smoking and alcohol intake.

<sup>c</sup>Model 3: model 2 + body mass index, hypertension, diabetes, dyslipidemia, blood pressure, fasting blood glucose, blood lipids, and carotid artery plaque.

**Supplementary Table 4: Correlations between carotid peak WSS and biomarkers of endothelial function and inflammation**

|                                           | Pearson correlation analysis |                | Partial correlations analysis <sup>a</sup> |                |
|-------------------------------------------|------------------------------|----------------|--------------------------------------------|----------------|
|                                           | correlation coefficient      | <i>P</i> value | correlation coefficient                    | <i>P</i> value |
| Brachial artery flow-mediated dilation, % | 0.457                        | <0.001         | 0.401                                      | <0.001         |
| Nitric oxide, μmol/L                      | 0.425                        | <0.001         | 0.353                                      | <0.001         |
| Endothelin-1, pg/ml                       | -0.372                       | <0.001         | -0.304                                     | <0.001         |
| Intercellular adhesion molecule-1, ng/ml  | -0.290                       | <0.001         | -0.222                                     | <0.001         |
| Vascular cell adhesion molecule-1, ng/ml  | -0.228                       | <0.001         | -0.148                                     | <0.001         |

<sup>a</sup> adjusted for age, sex, smoking, alcohol intake, body mass index, hypertension, diabetes, dyslipidemia, blood pressure, fasting blood glucose, blood lipids, and carotid artery plaque.
